# Supplementary material for: Predicting the Difficult Neonatal Airway in Fetuses With Micrognathia, Oropharyngeal or Neck Mass Lesions: Two‐Center Experience With Fetal MRI
Source: Prenat Diagn. 2024 Sep 24;44(13):1593–602. doi: 10.1002/pd.6651 (PMC11628208; doi:10.1002/pd.6651)
Supplement: Supplementary file 1 — Supporting Information S1 [file PD-44-1593-s001.pdf]

## Supplementary Table: Clinical and Imaging Data for Individual Cases: Masses and Micrognathia

[illegible]
